# Supplementary material for: Aberrant GIMAP2 expression affects oral squamous cell carcinoma progression by promoting cell cycle and inhibiting apoptosis
Source: PubMed Central journal article supplement — Oncol Lett. 2021 Dec 14;23(2):49. doi: 10.3892/ol.2021.13167 (PMC8721858; doi:10.3892/ol.2021.13167), 2021-12-14

Figure S1. Evaluation of GIMAP isoform expression in OSCC-derived cell lines. (A) GIMAP1: RT-qPCR analysis showed that GIMAP1 mRNA expression was upregulated ( $P < 0.05$ , Dunnett's tests) in the two OSCC cell lines compared with that in HNOKs. (B) GIMAP5: RT-qPCR analysis showed that GIMAP5 mRNA expression was upregulated ( $P < 0.05$ , Dunnett's tests) in only one OSCC cell line compared with that in HNOKs. (C) GIMAP6: RT-qPCR analysis revealed that GIMAP6 mRNA expression was not upregulated ( $P < 0.05$ , Dunnett's test) in OSCC cell lines compared with that in HNOKs. (D) GIMAP8: RT-qPCR analysis showed that GIMAP8 mRNA expression was upregulated ( $P < 0.05$ , Dunnett's tests) in only one OSCC cell line compared with that in HNOKs. Data are expressed as mean  $\pm$  standard error of the mean of triplicate results. The expression of either GIMAP4 or GIMAP7 was not detected. GIMAP2, GTPases of immunity-associated proteins 2; OSCC, oral squamous cell carcinoma; RT-qPCR, reverse transcription-quantitative PCR.

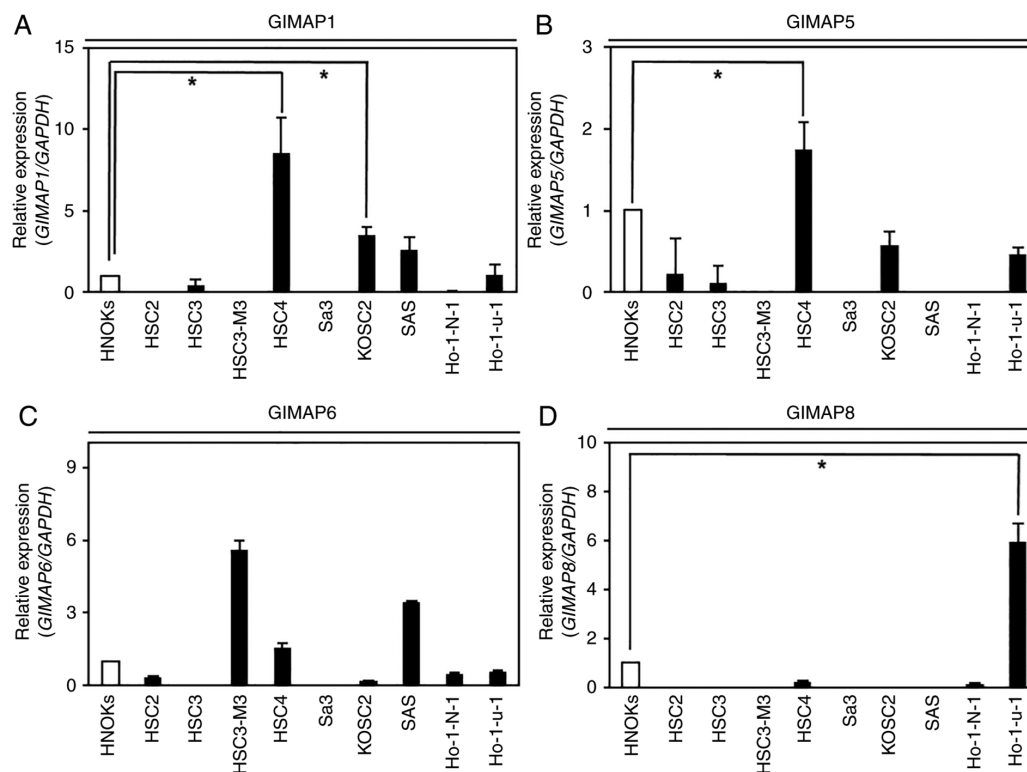

Figure S2. Expression status of Ho-1-u-1 due to different primers and western blotting gel images pertaining to Fig. 1B. The RT-qPCR analysis showed that GIMAP2 mRNA expression was not upregulated ( $P < 0.05$ , Student's t-test) in Ho-1-u-1 compared with that in HNOKs. Data are expressed as mean  $\pm$  standard error of the mean of triplicate results. western blotting was conducted three times per cell type. Non-continuous parts of blots probed on the same membrane, indicated with vertical lines, are shown. RT-qPCR, reverse transcription-quantitative PCR; GIMAP2, GTPases of immunity-associated proteins 2; HNOK, human normal oral keratinocyte.

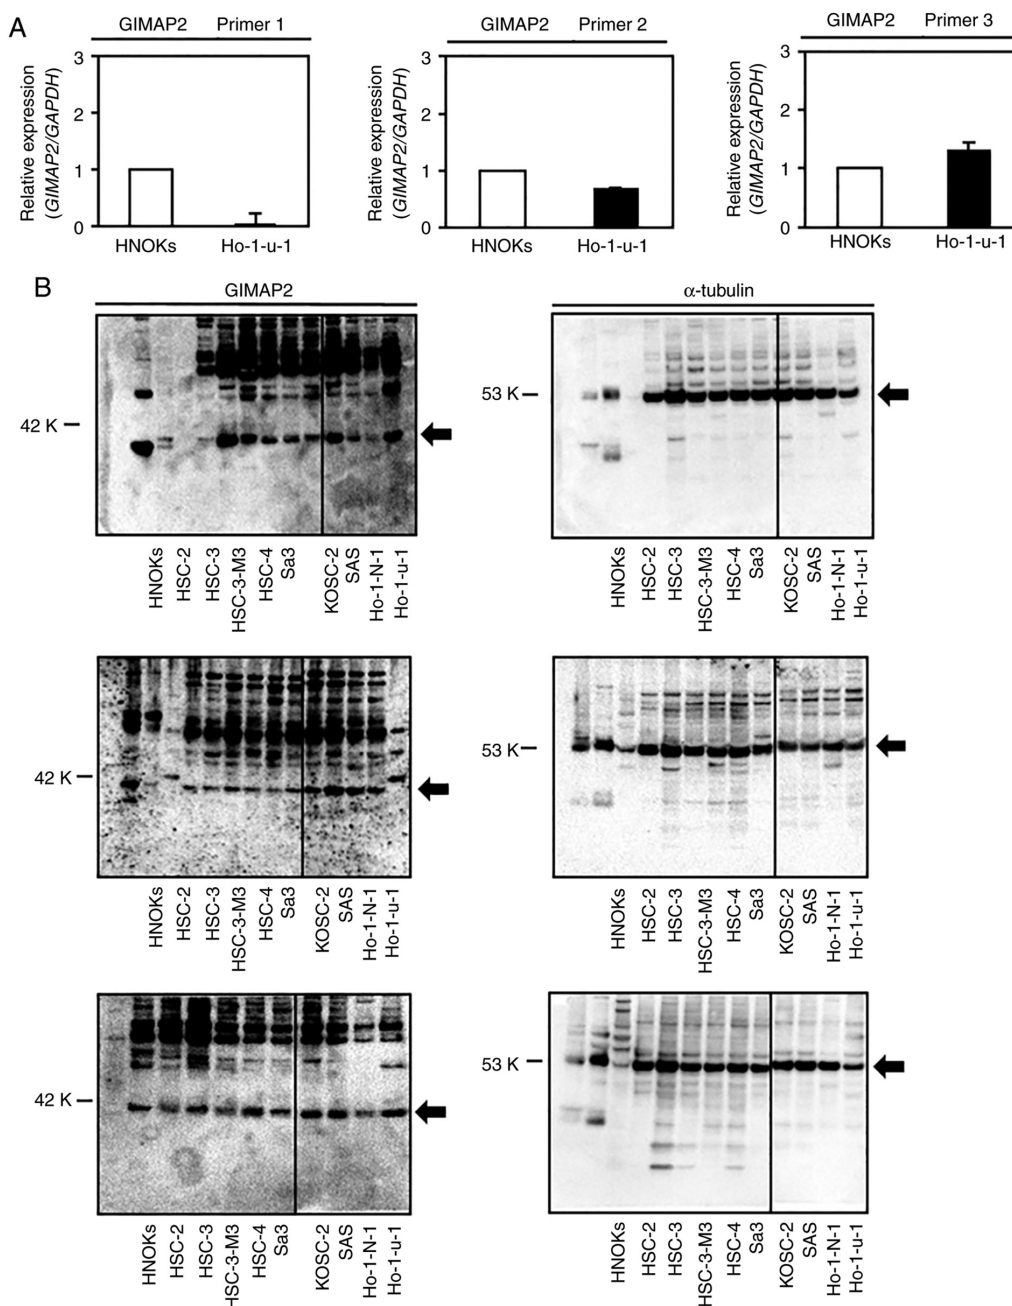

Figure S3. Western blotting gel images pertaining to Fig. 2B. Western blotting was conducted three times per cell type.

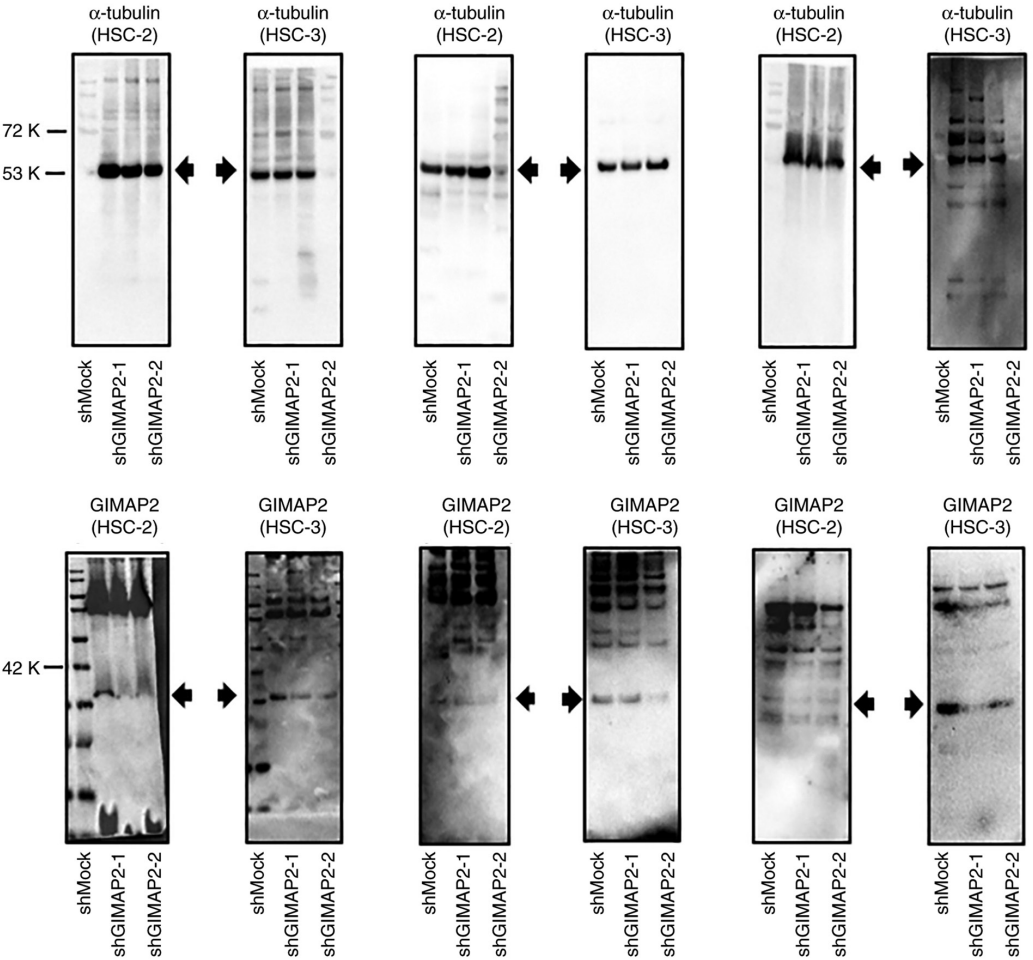

Figure S4. Continued.

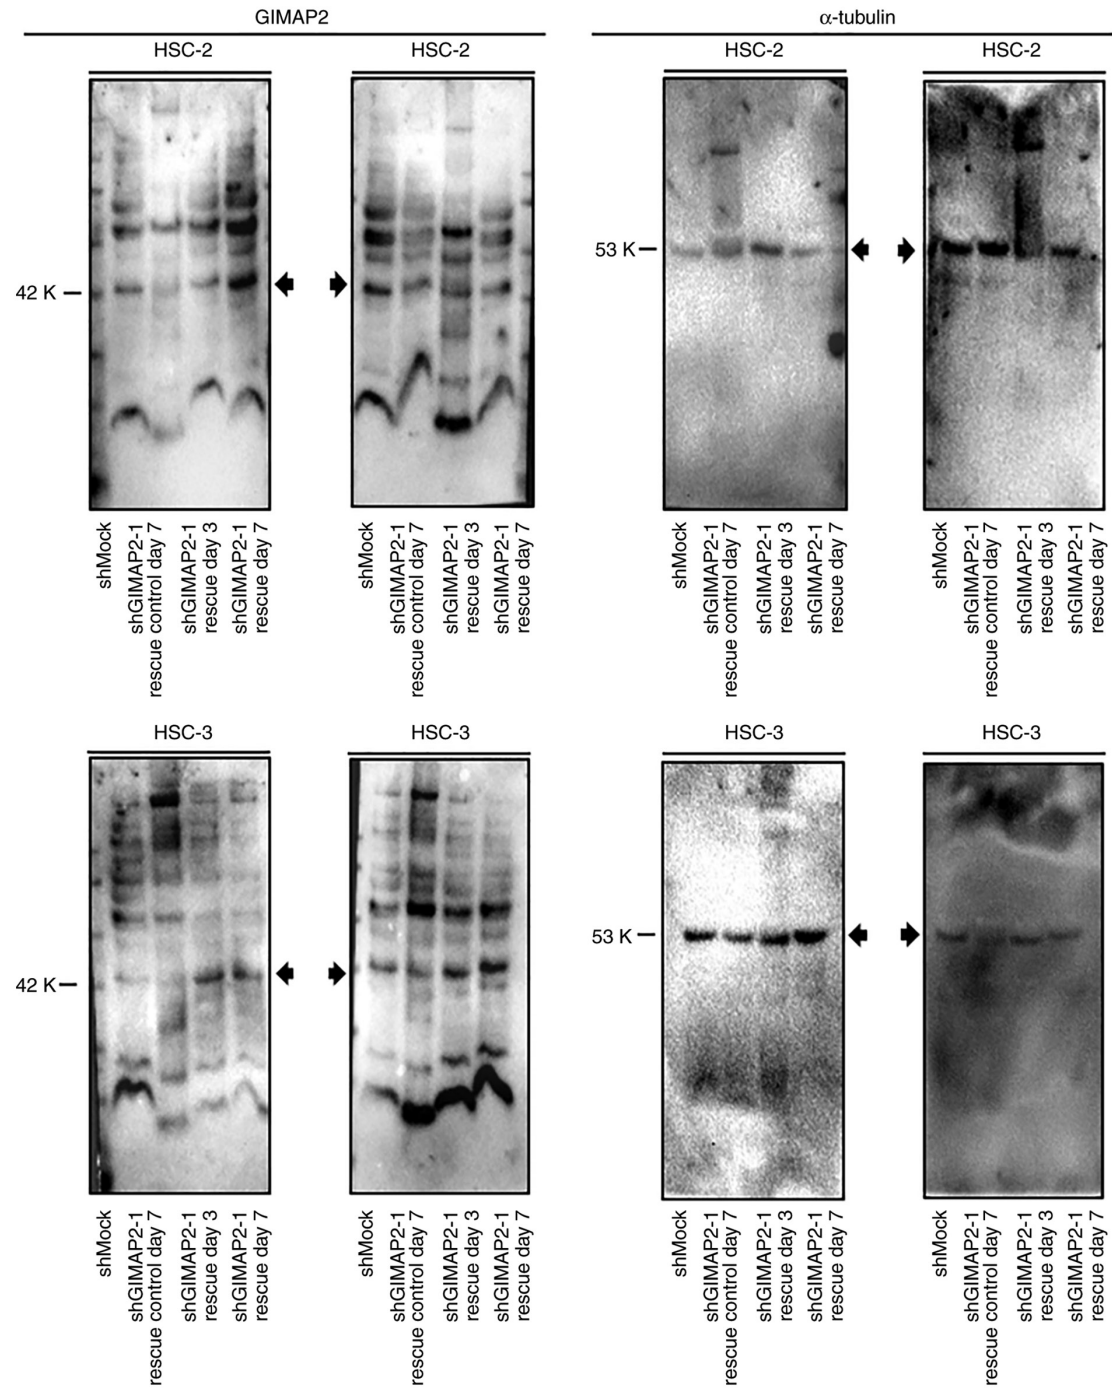

Figure S4. Continued.

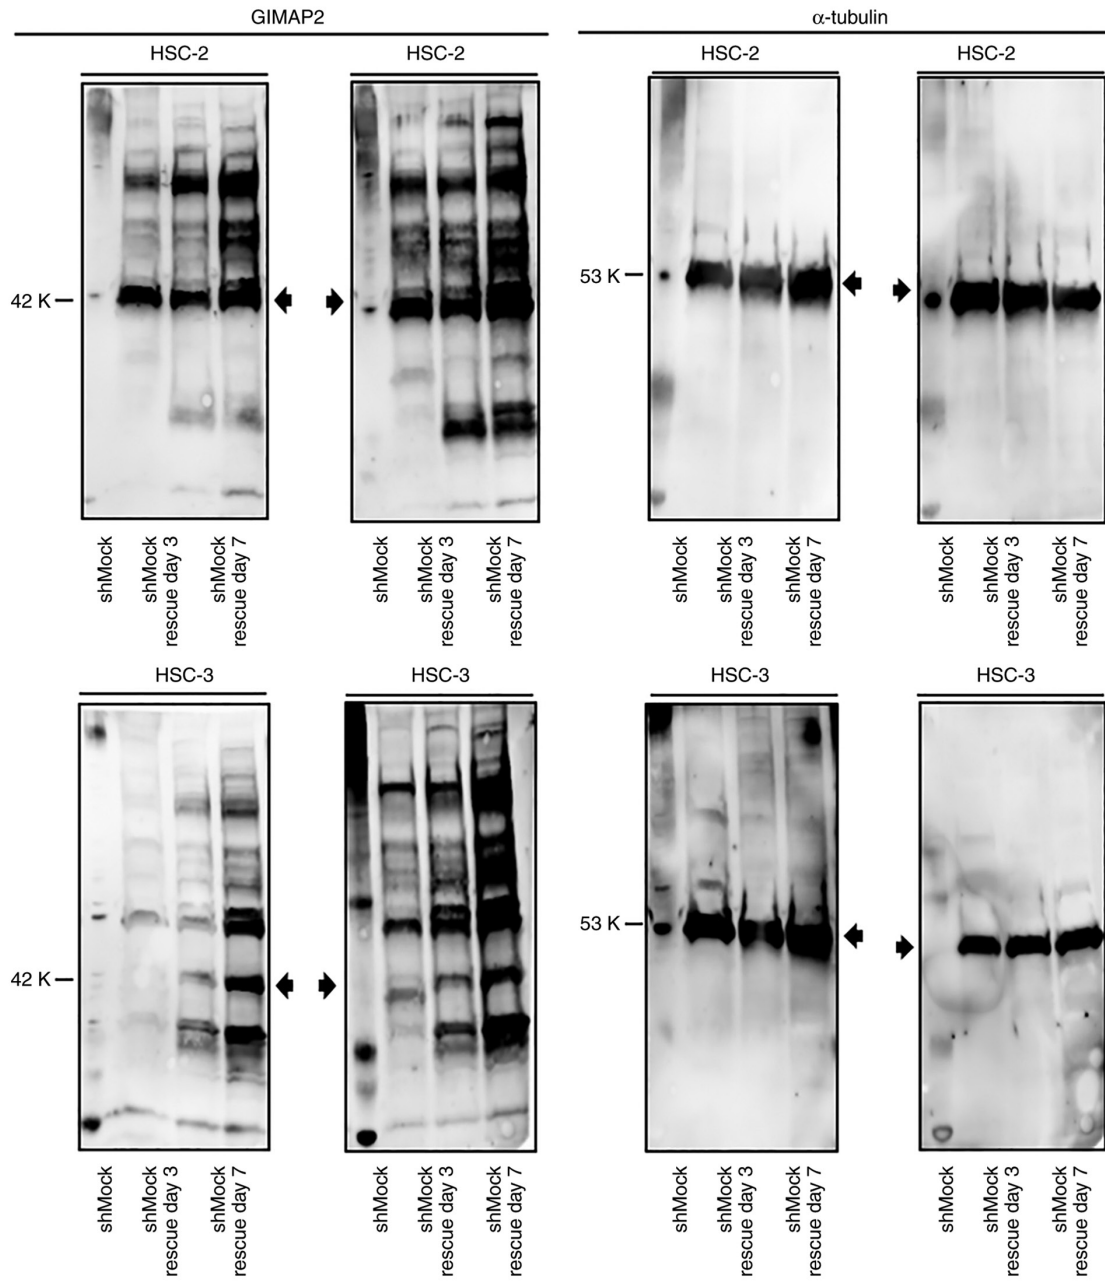

Figure S4. Western blotting gel images of GIMAP2 transiently transfected cells. It was confirmed that the expression of GIMAP2 protein increased in GIMAP2-transfected shMock cells (HSC-2 shMock GIMAP2 overexpression and HSC-3 shMock GIMAP2 overexpression), but not in the control shMock cells (HSC-2 shMock control and HSC-3 shMock control). Cell growth was observed in GIMAP2 transiently transfected cells (HSC-2 shGIMAP2-1 rescue and HSC-3 shGIMAP2-1 rescue) but not in shGIMAP2 cells (HSC-2 shGIMAP2-1 rescue control and HSC-3 shGIMAP2-1 rescue control). western blotting was conducted twice per cell type; GIMAP2, GTPases of immunity-associated proteins 2; sh, short hairpin.

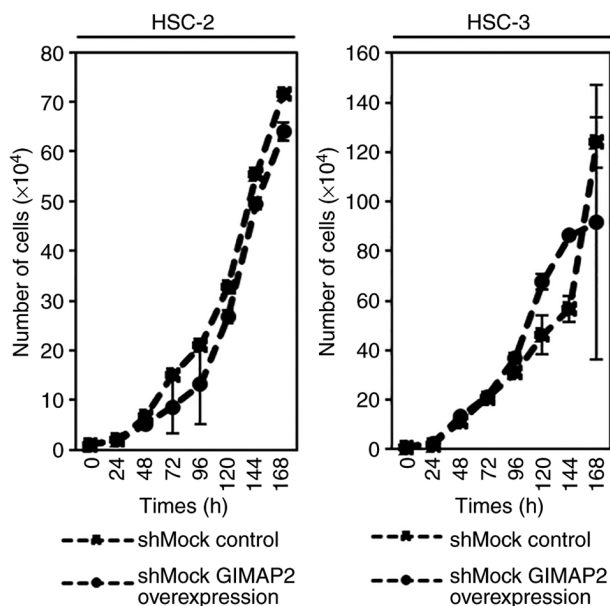

Figure S5. Continued.

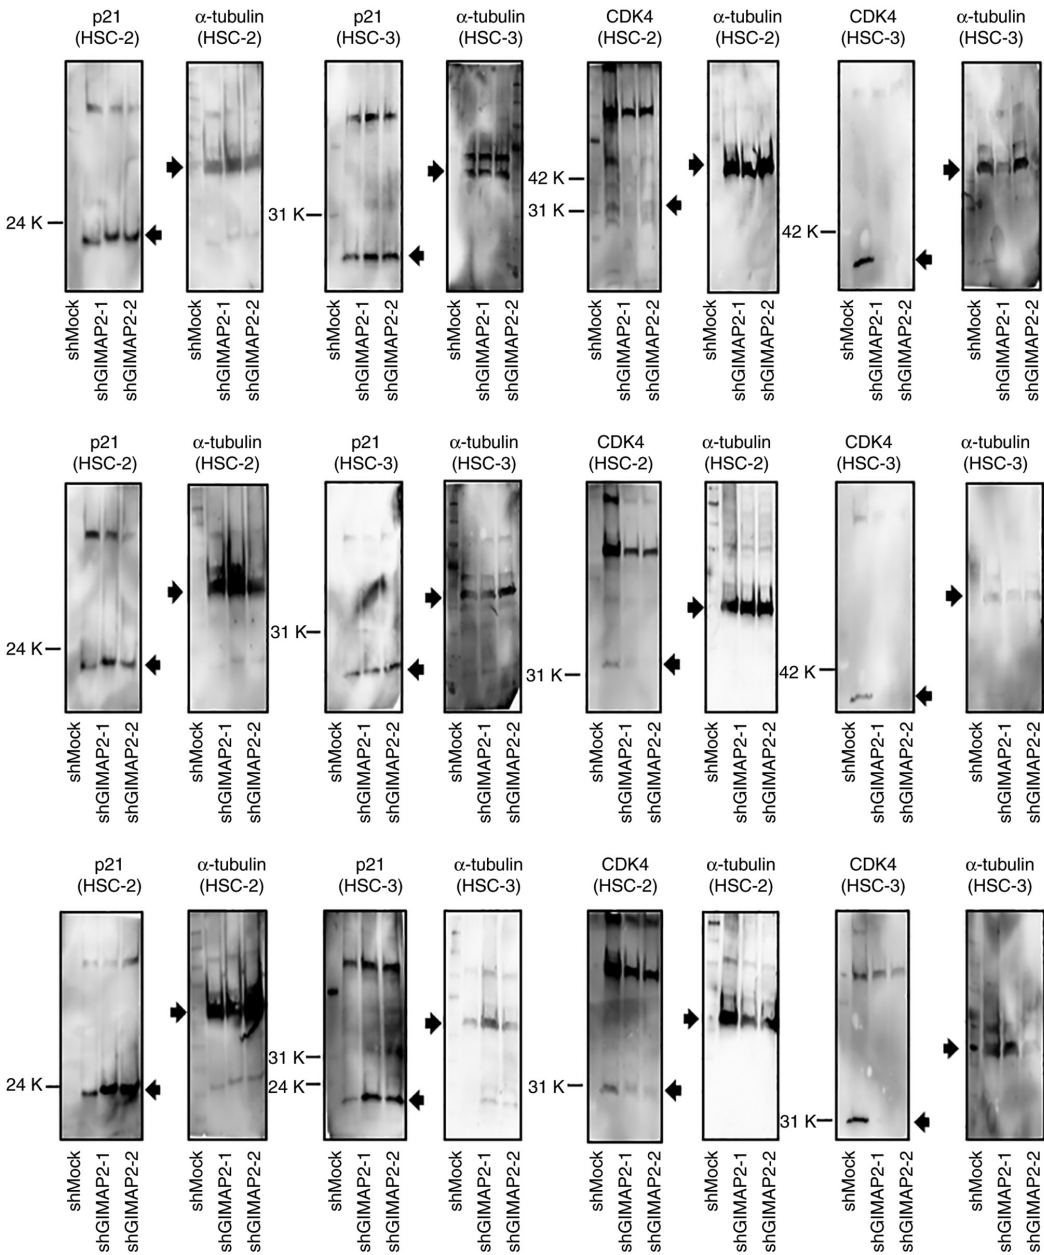

Figure S5. Continued.

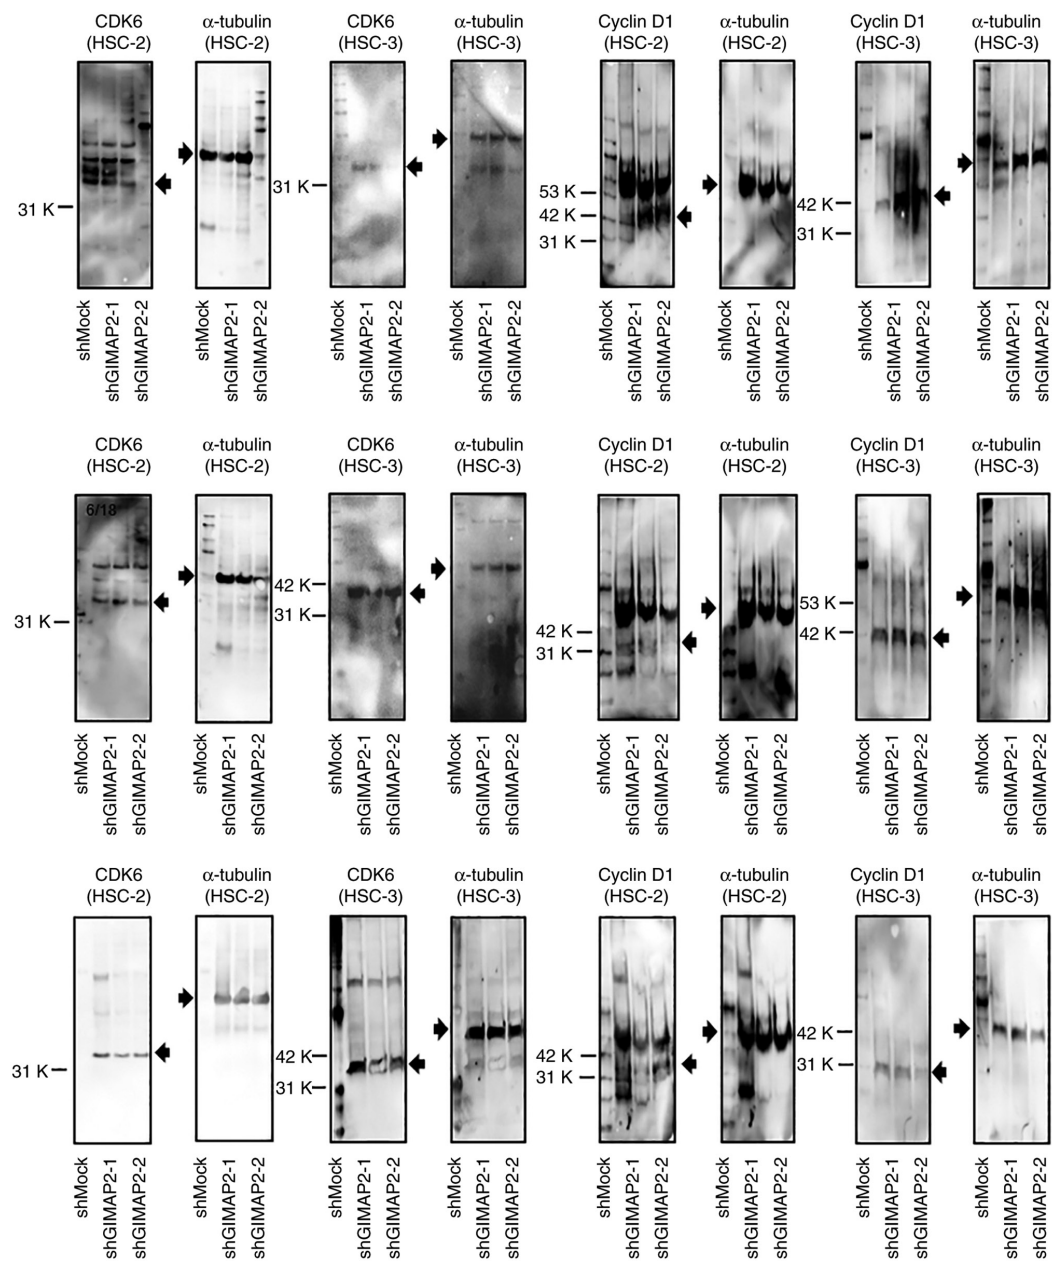

Figure S5. Continued.

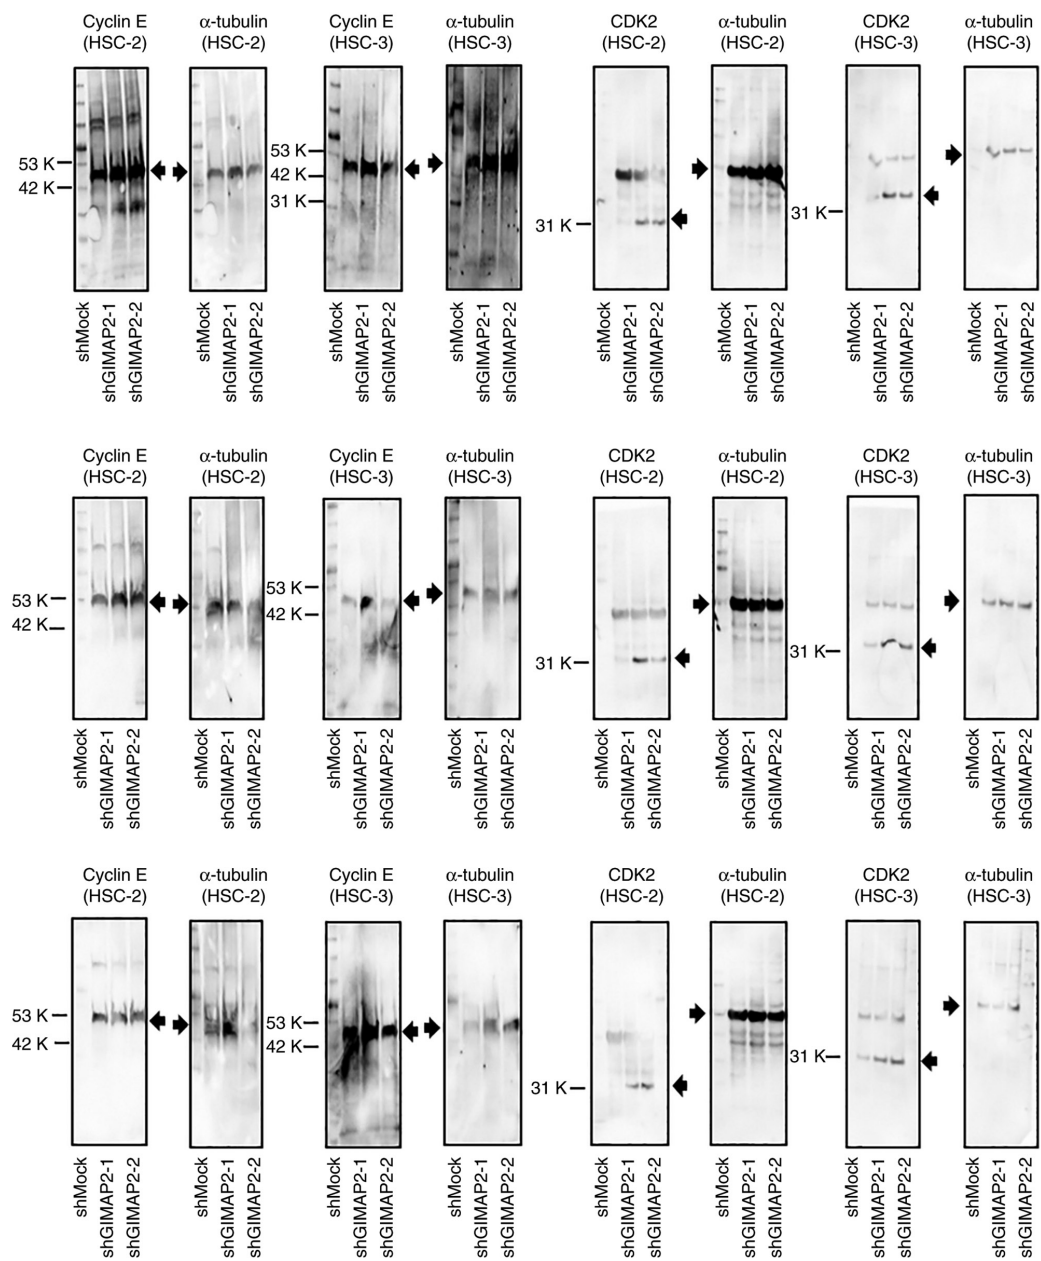

Figure S5. Continued.

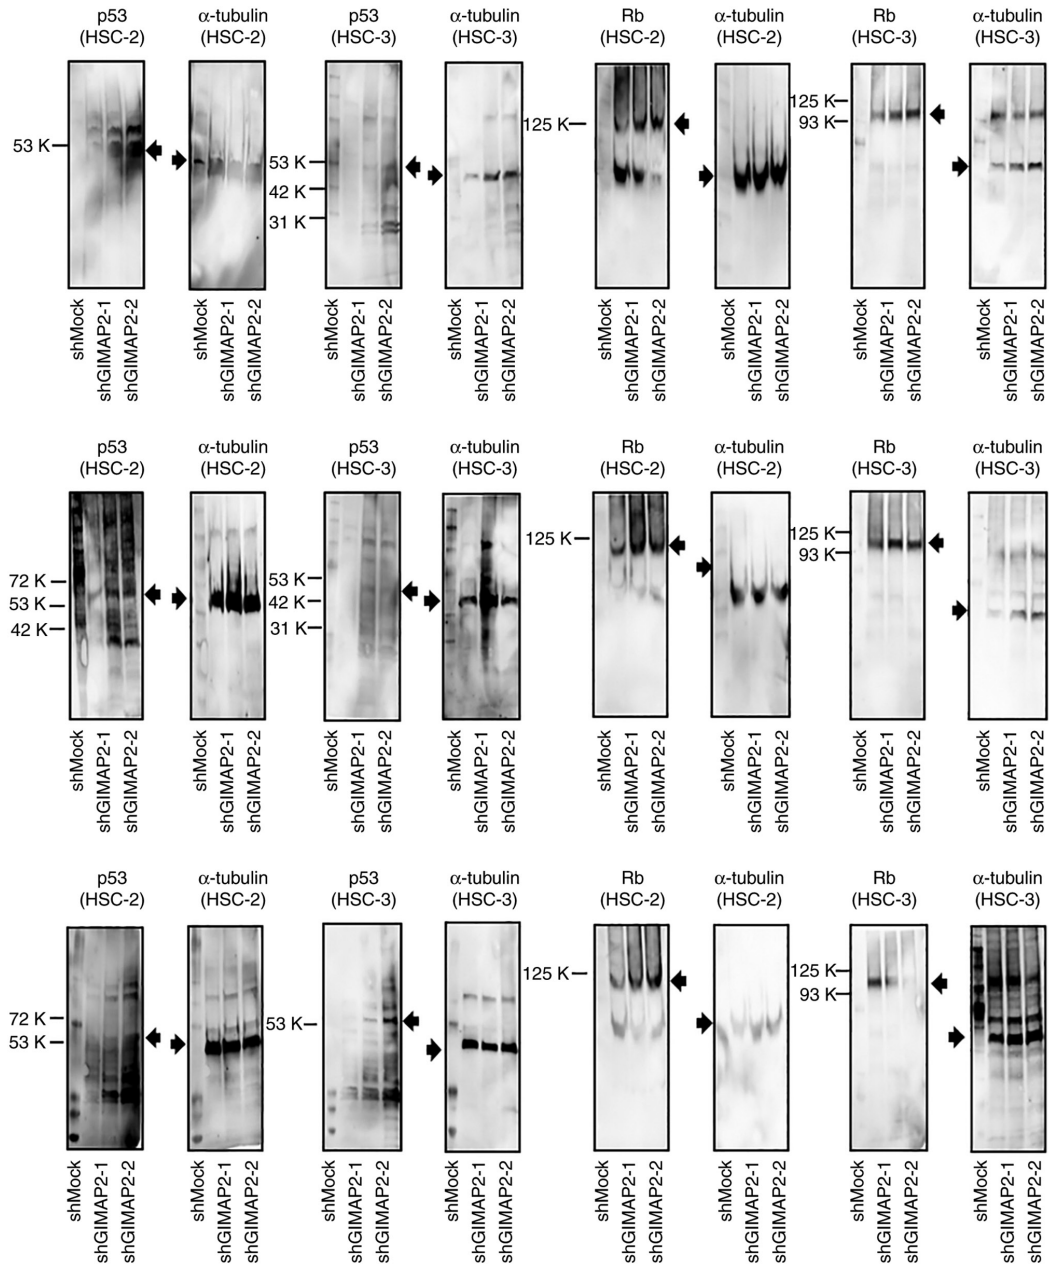

Figure S5. Continued.

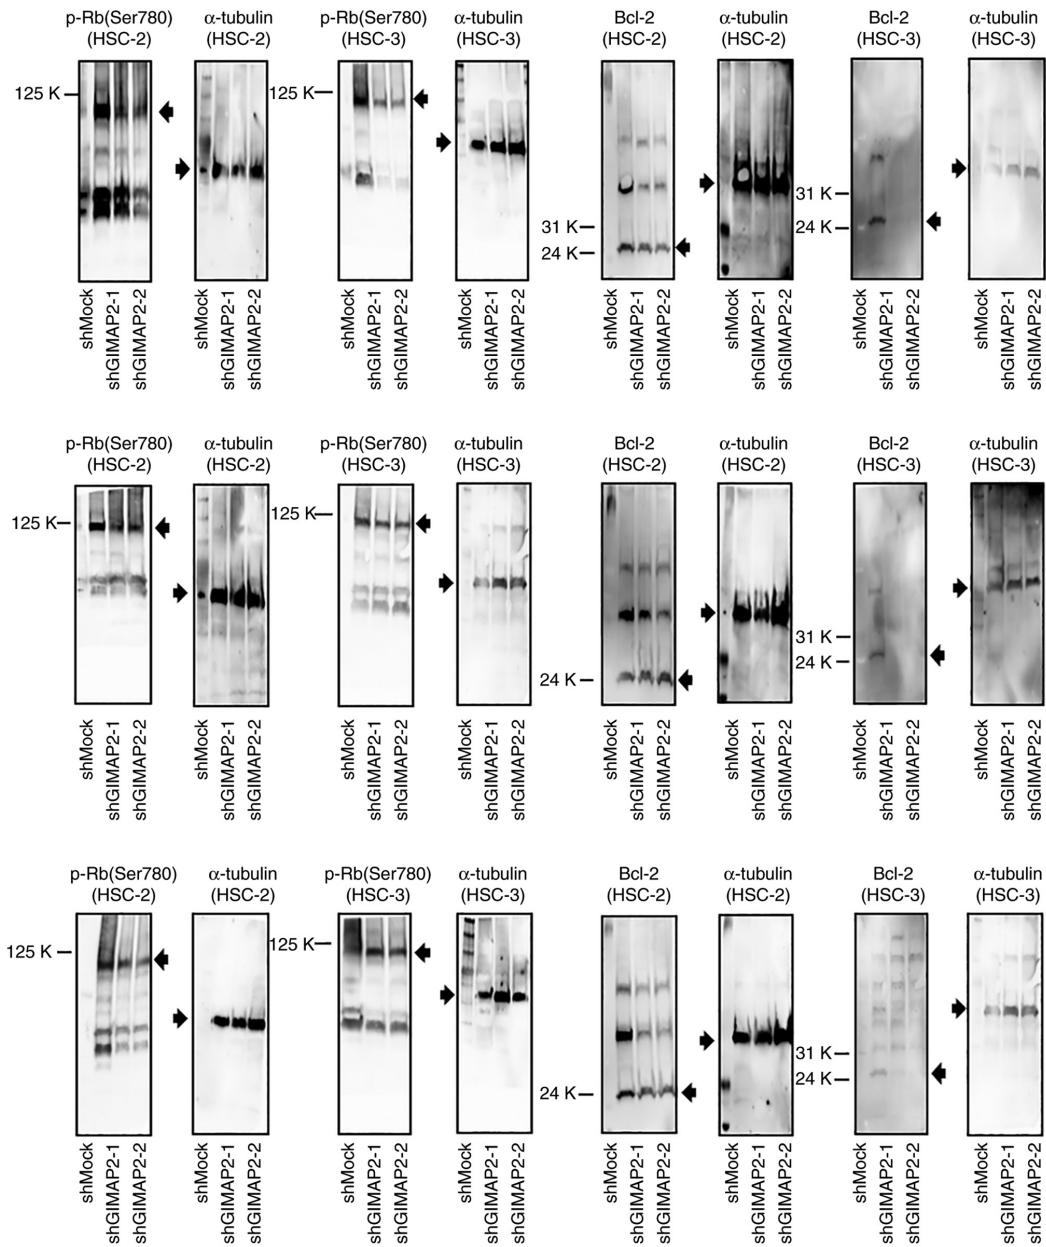

Figure S5. Continued.

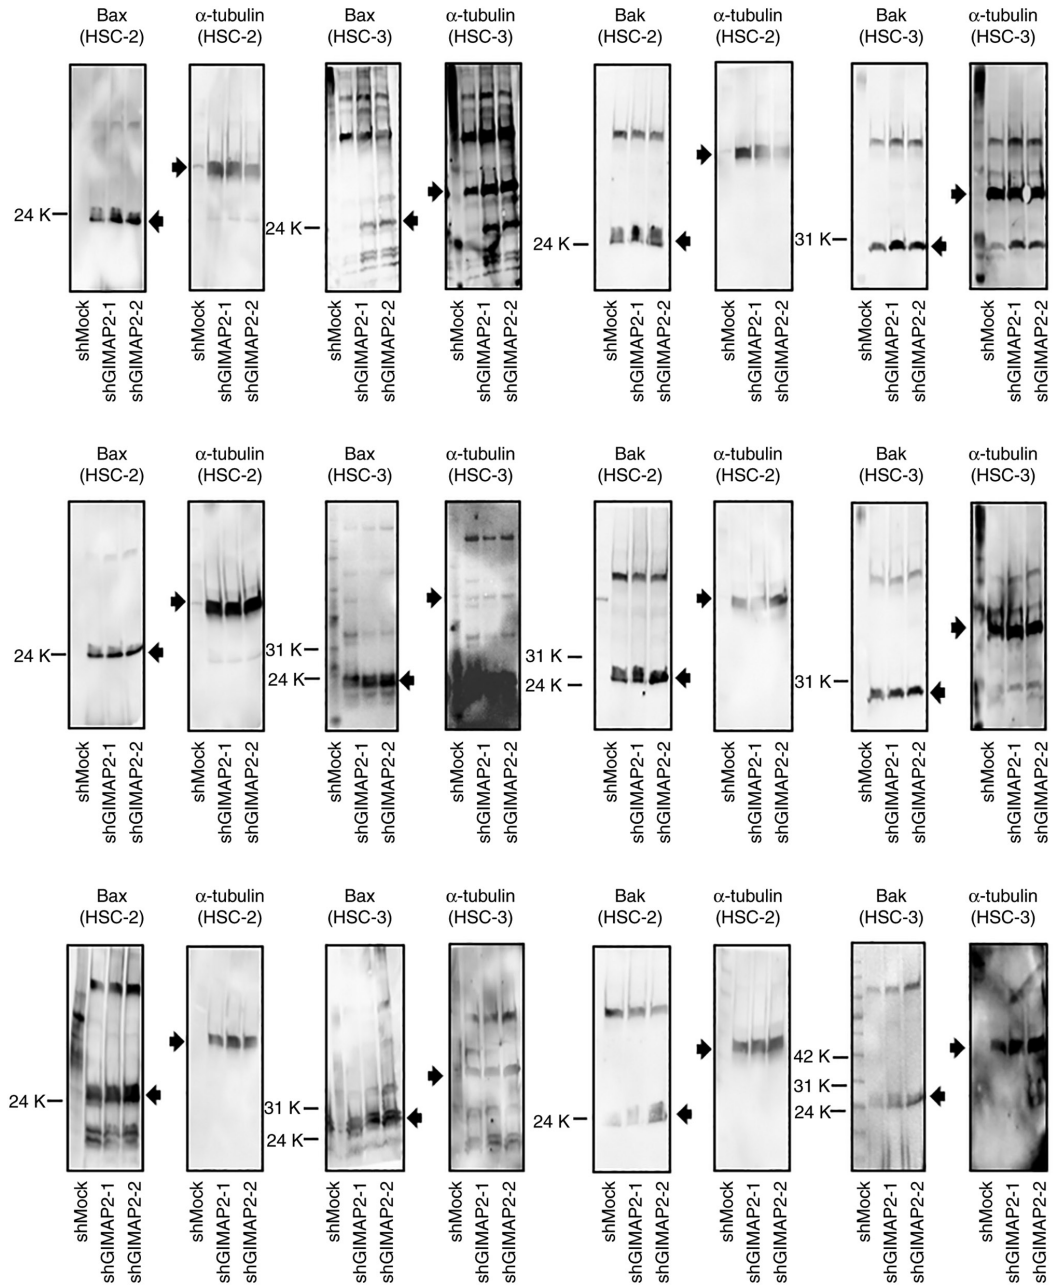

Figure S5. Western blotting gel images pertaining to Fig. 4.  
Western blotting was conducted three times per cell type .

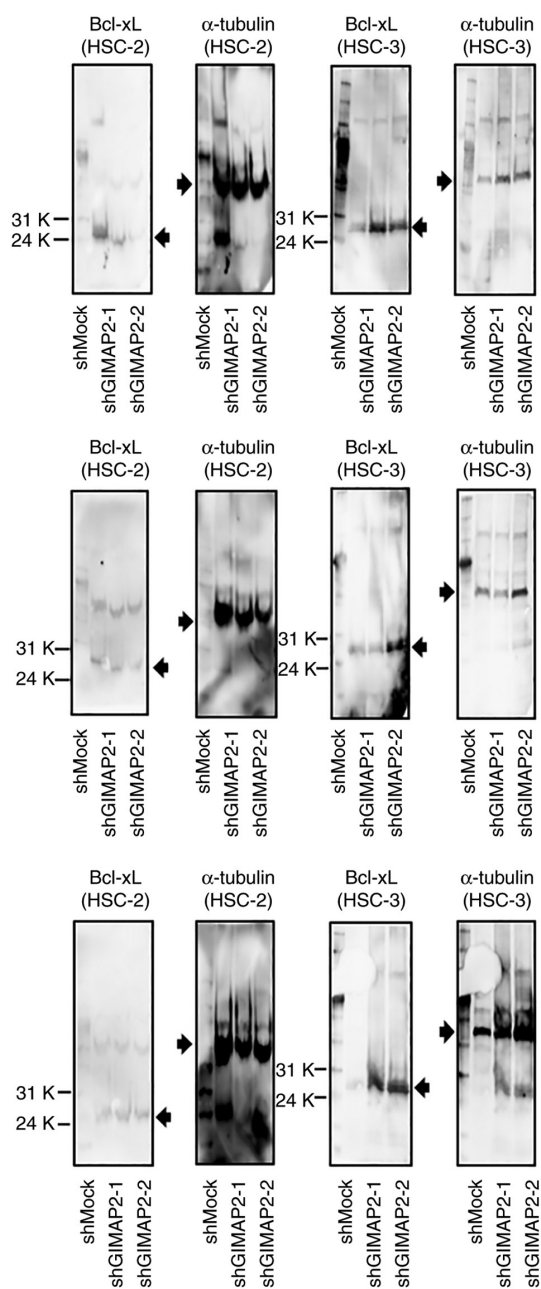

Supplement: Supplementary_Data.pdf [file Supplementary_Data.pdf]
